# Supplementary material
Source: Springer Nature journal article supplement (https://www.springermedizin.de/resource/supplementary/12885_2013_4137_MOESM7_ESM.pdf/9465540)

Karpas

Dep1

6RD3

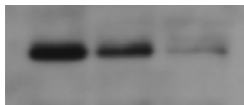

← MT1-MMP

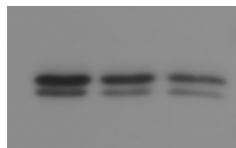

← Phospho-p44  
← Phospho-p42

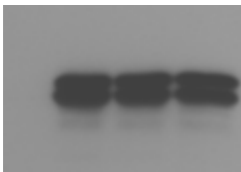

← p44  
← p42

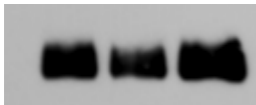

← alpha5 integrin

Supplement: MOESM7 [file 9465540]
